# Supplementary material for: Strain Structure and Dynamics Revealed by Targeted Deep Sequencing of the Honey Bee Gut Microbiome
Source: PubMed Central journal article supplement (PMC7449624; doi:10.1128/msphere.00694-20), 2020-08-26

*Snodgrassella alvi*

*guaA*

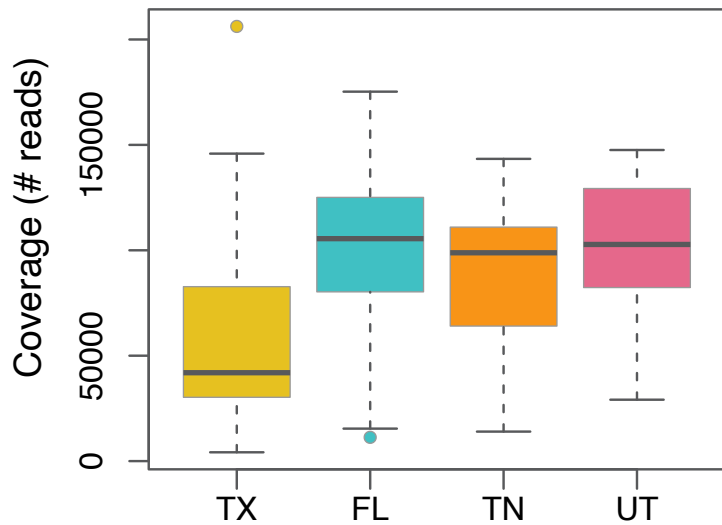

*Snodgrassella alvi*

*gluS*

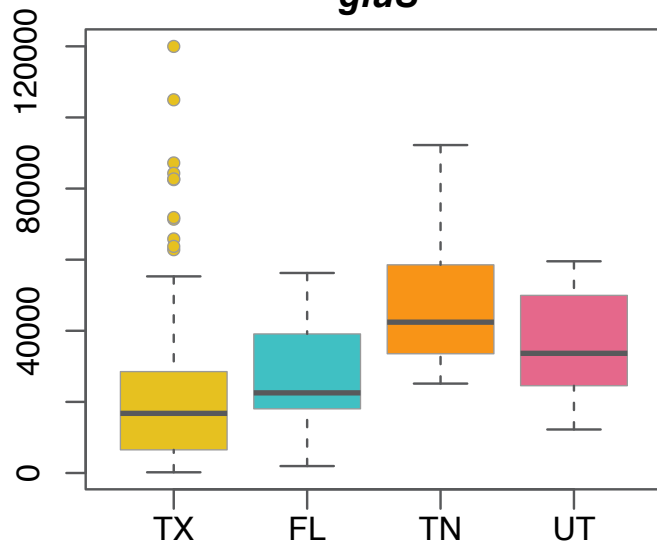

*Gilliamella apicola*

*pflA*

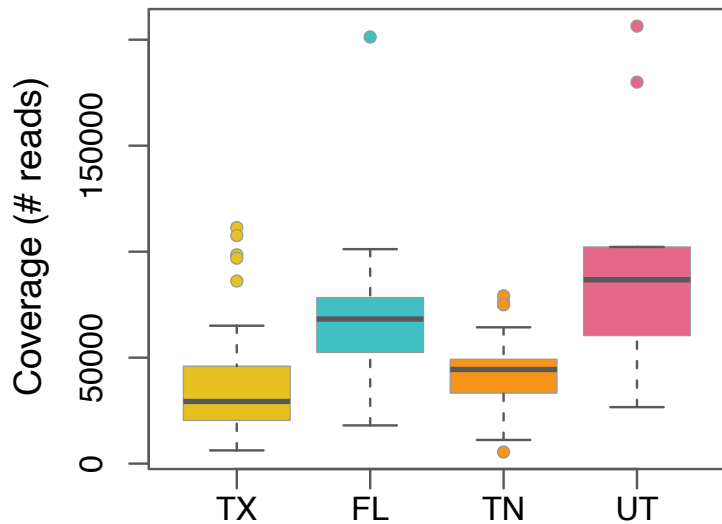

*Gilliamella* spp.

*rimM*

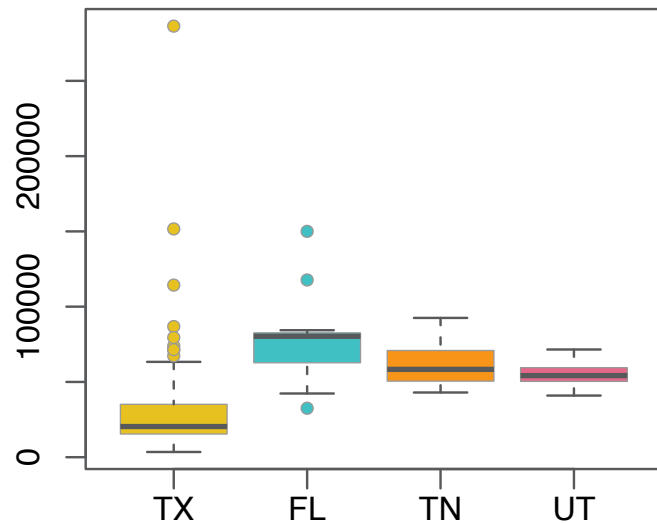

Supplement: mSphere.00694-20-sf001.pdf [file mSphere.00694-20-sf001.pdf]
