# Supplementary material for: Strain Structure and Dynamics Revealed by Targeted Deep Sequencing of the Honey Bee Gut Microbiome
Source: PubMed Central journal article supplement (PMC7449624; doi:10.1128/msphere.00694-20), 2020-08-26

## Snodgrassella Reference Tree

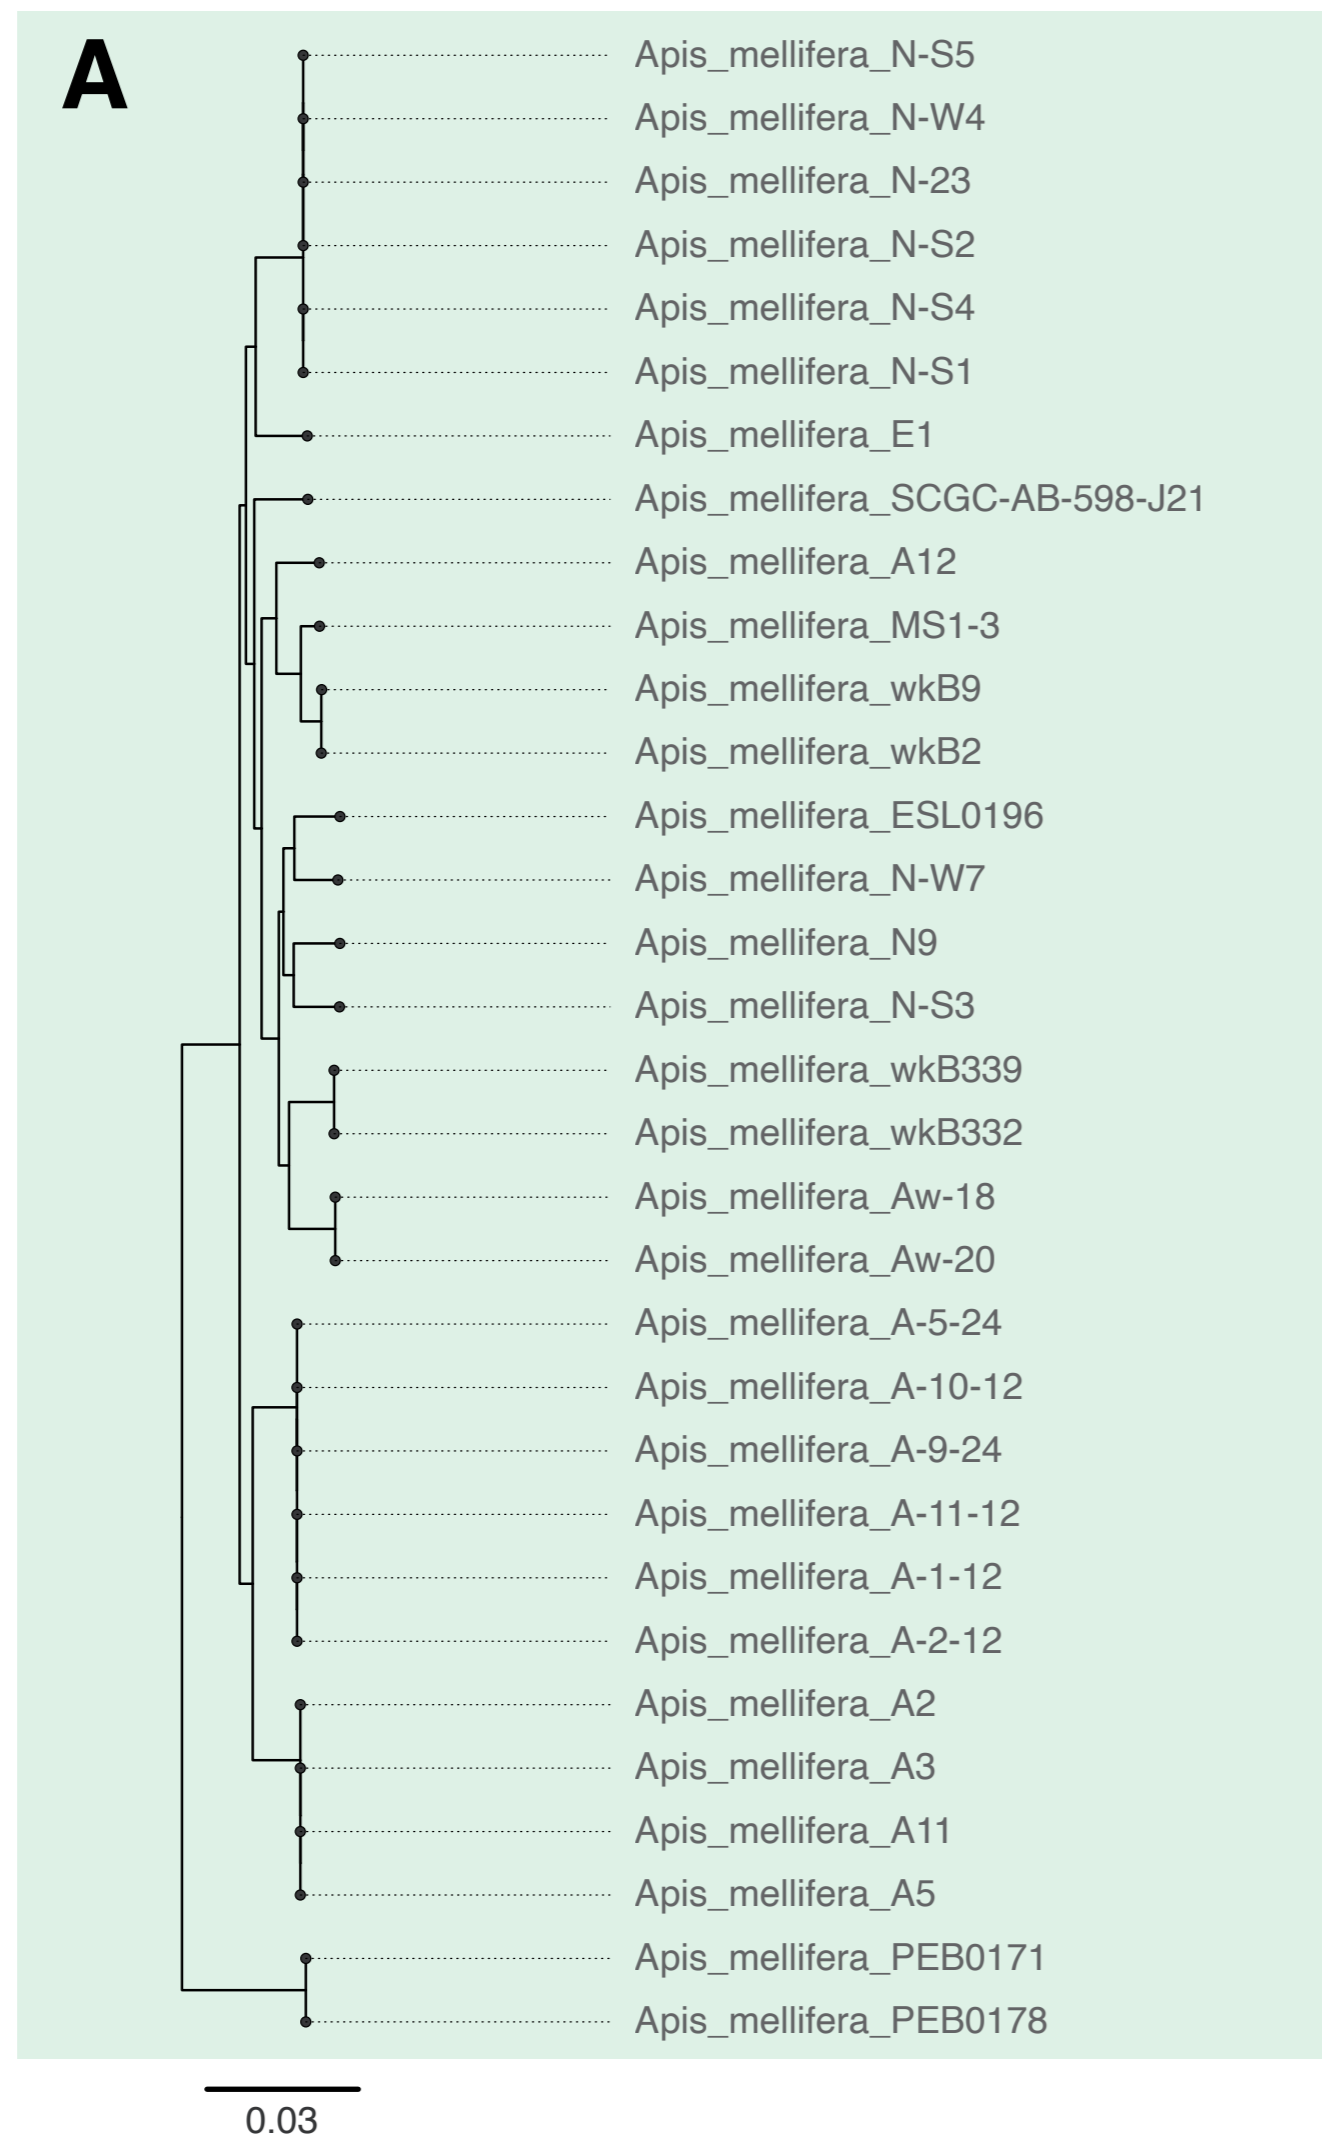

## gluS Amplicon Tree

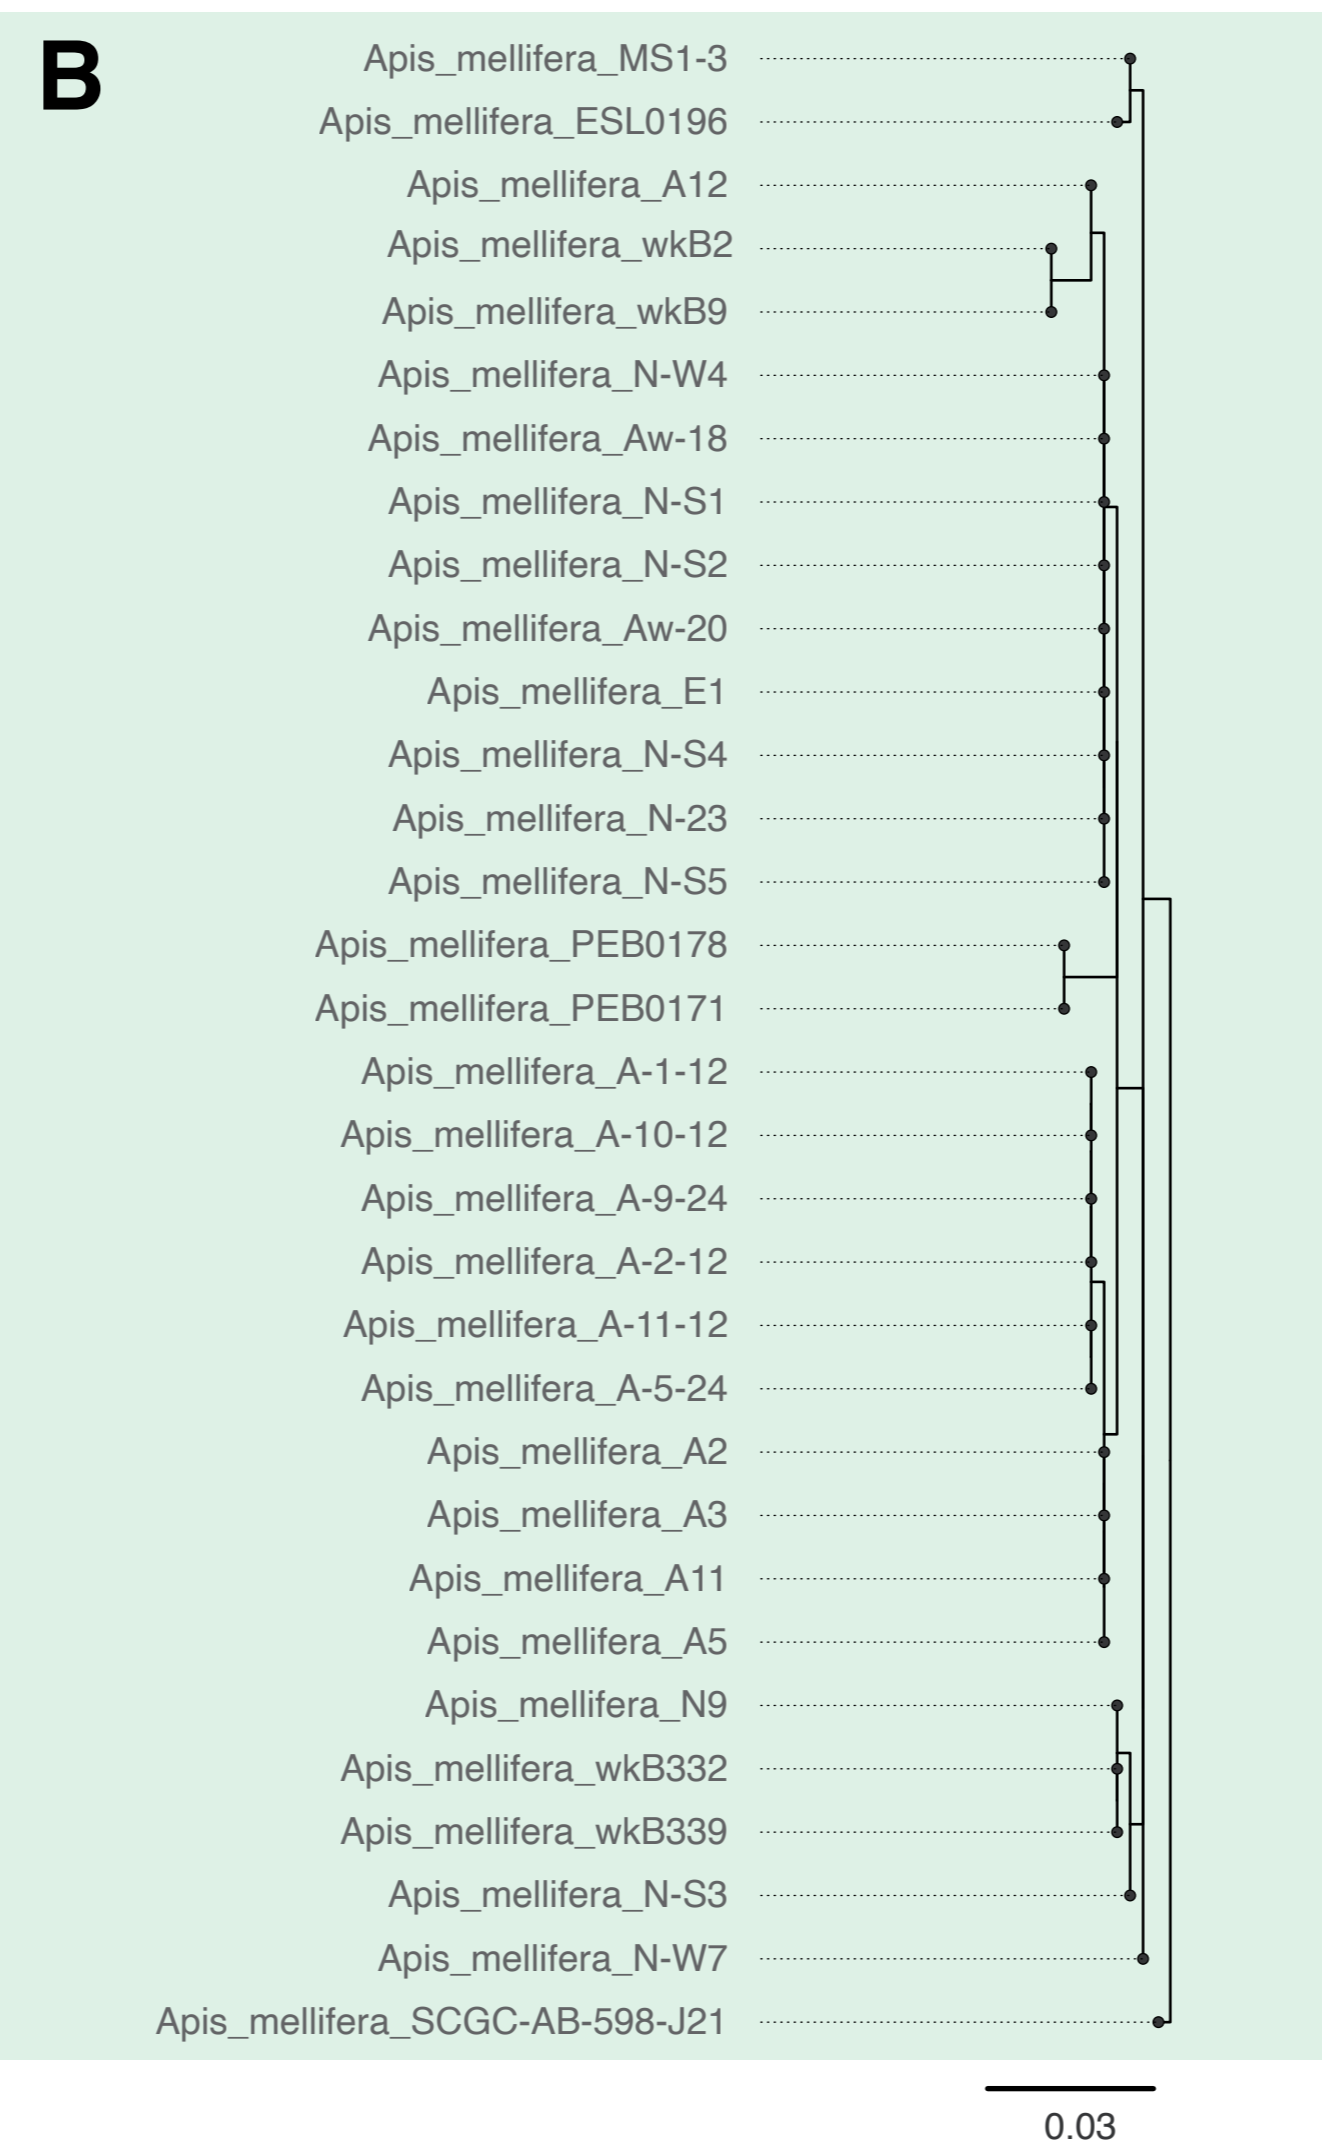

## guaA Amplicon Tree

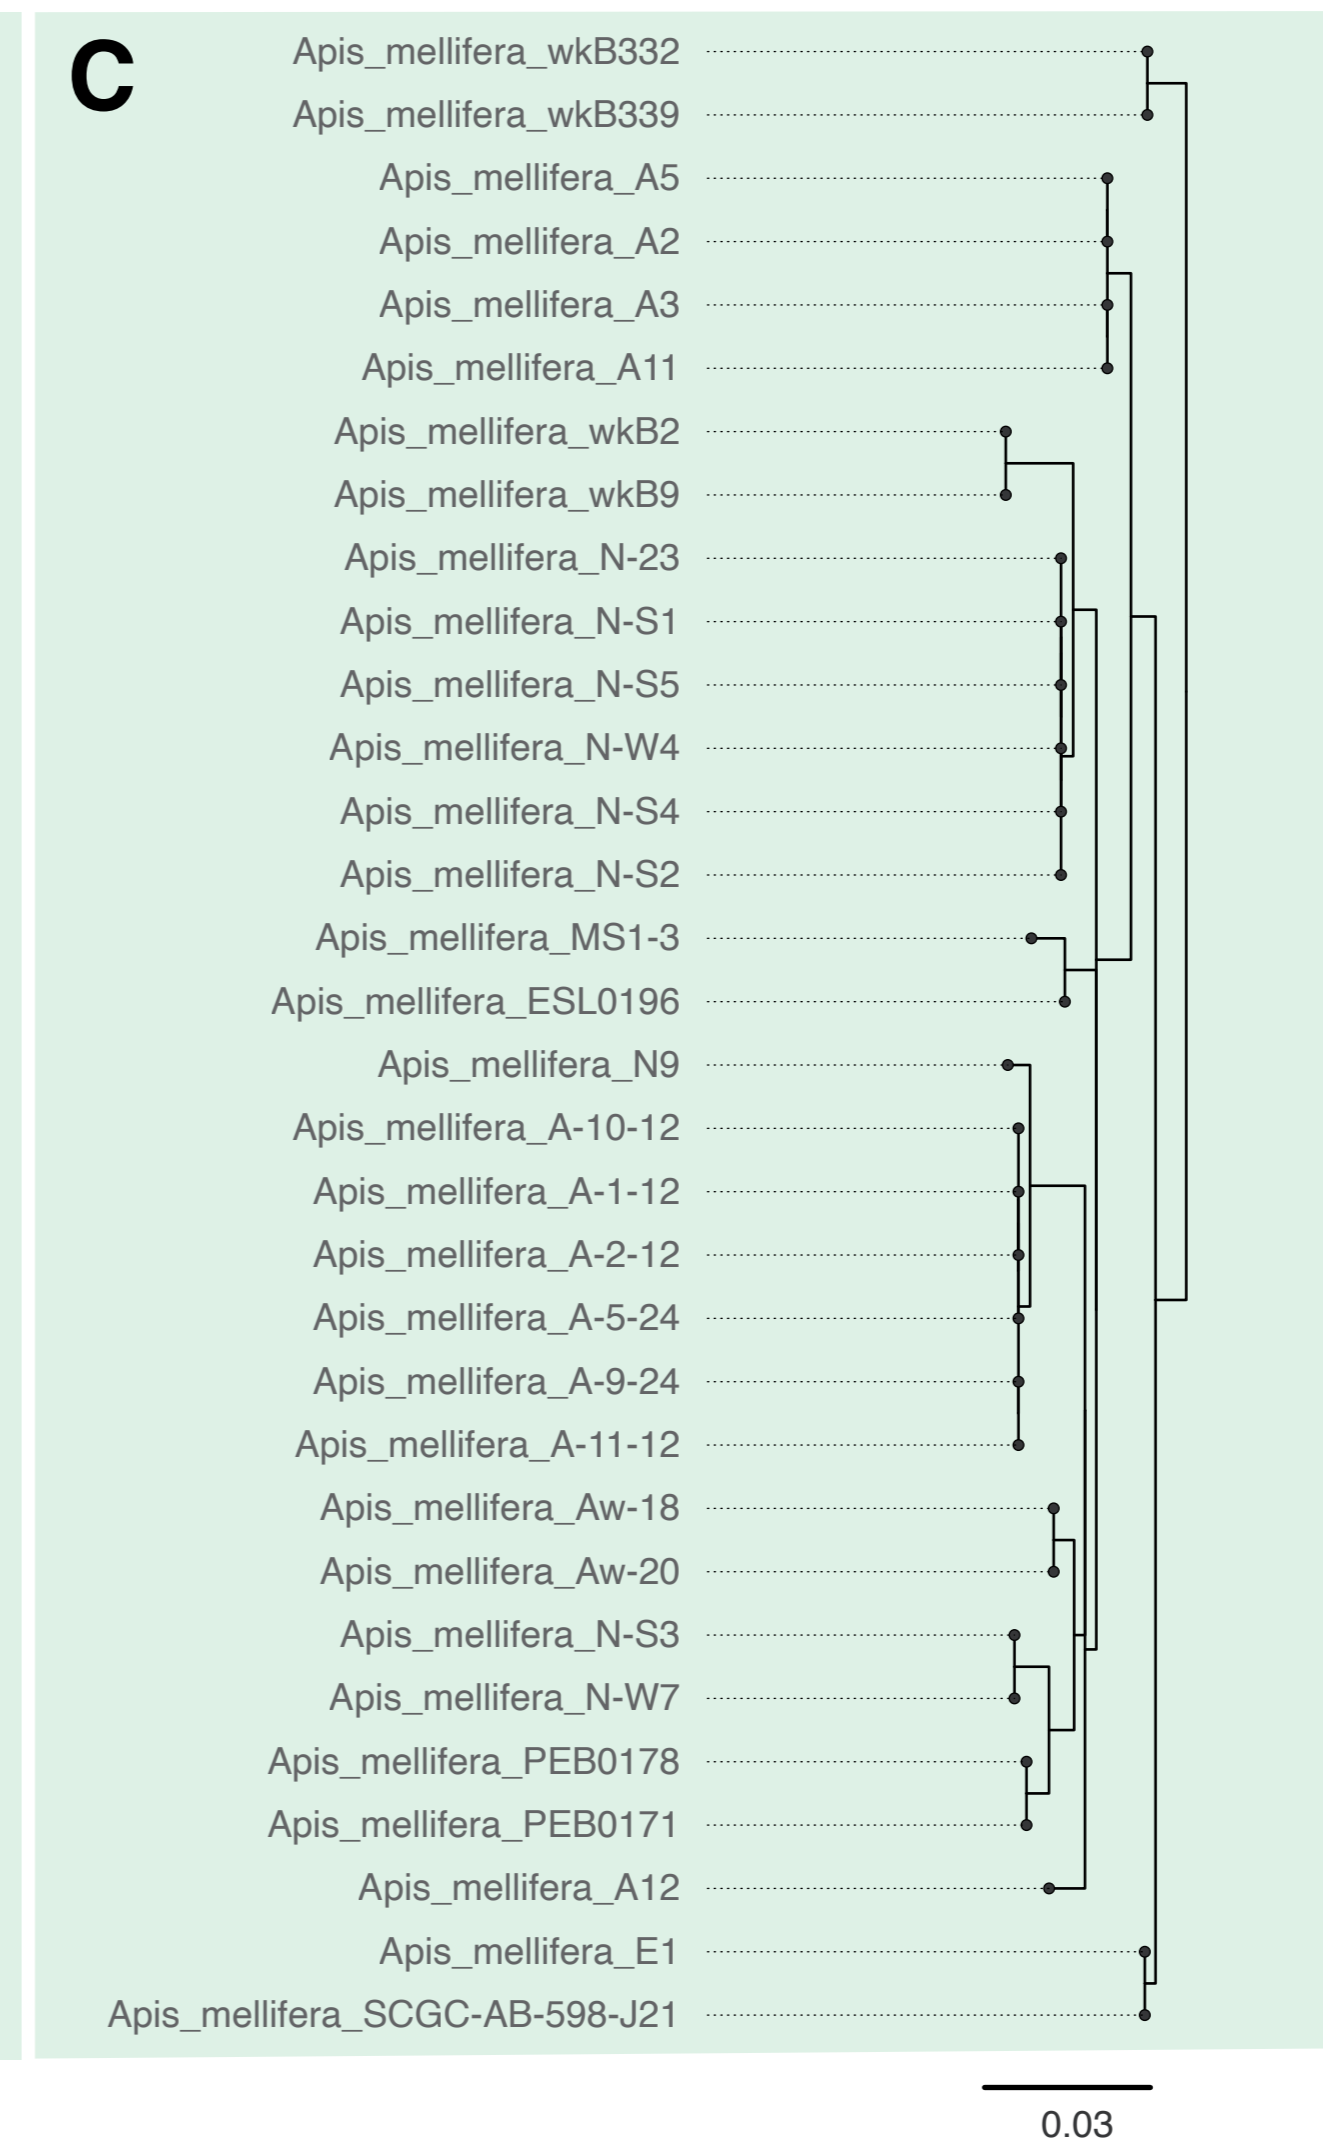

## Gilliamella Reference Tree

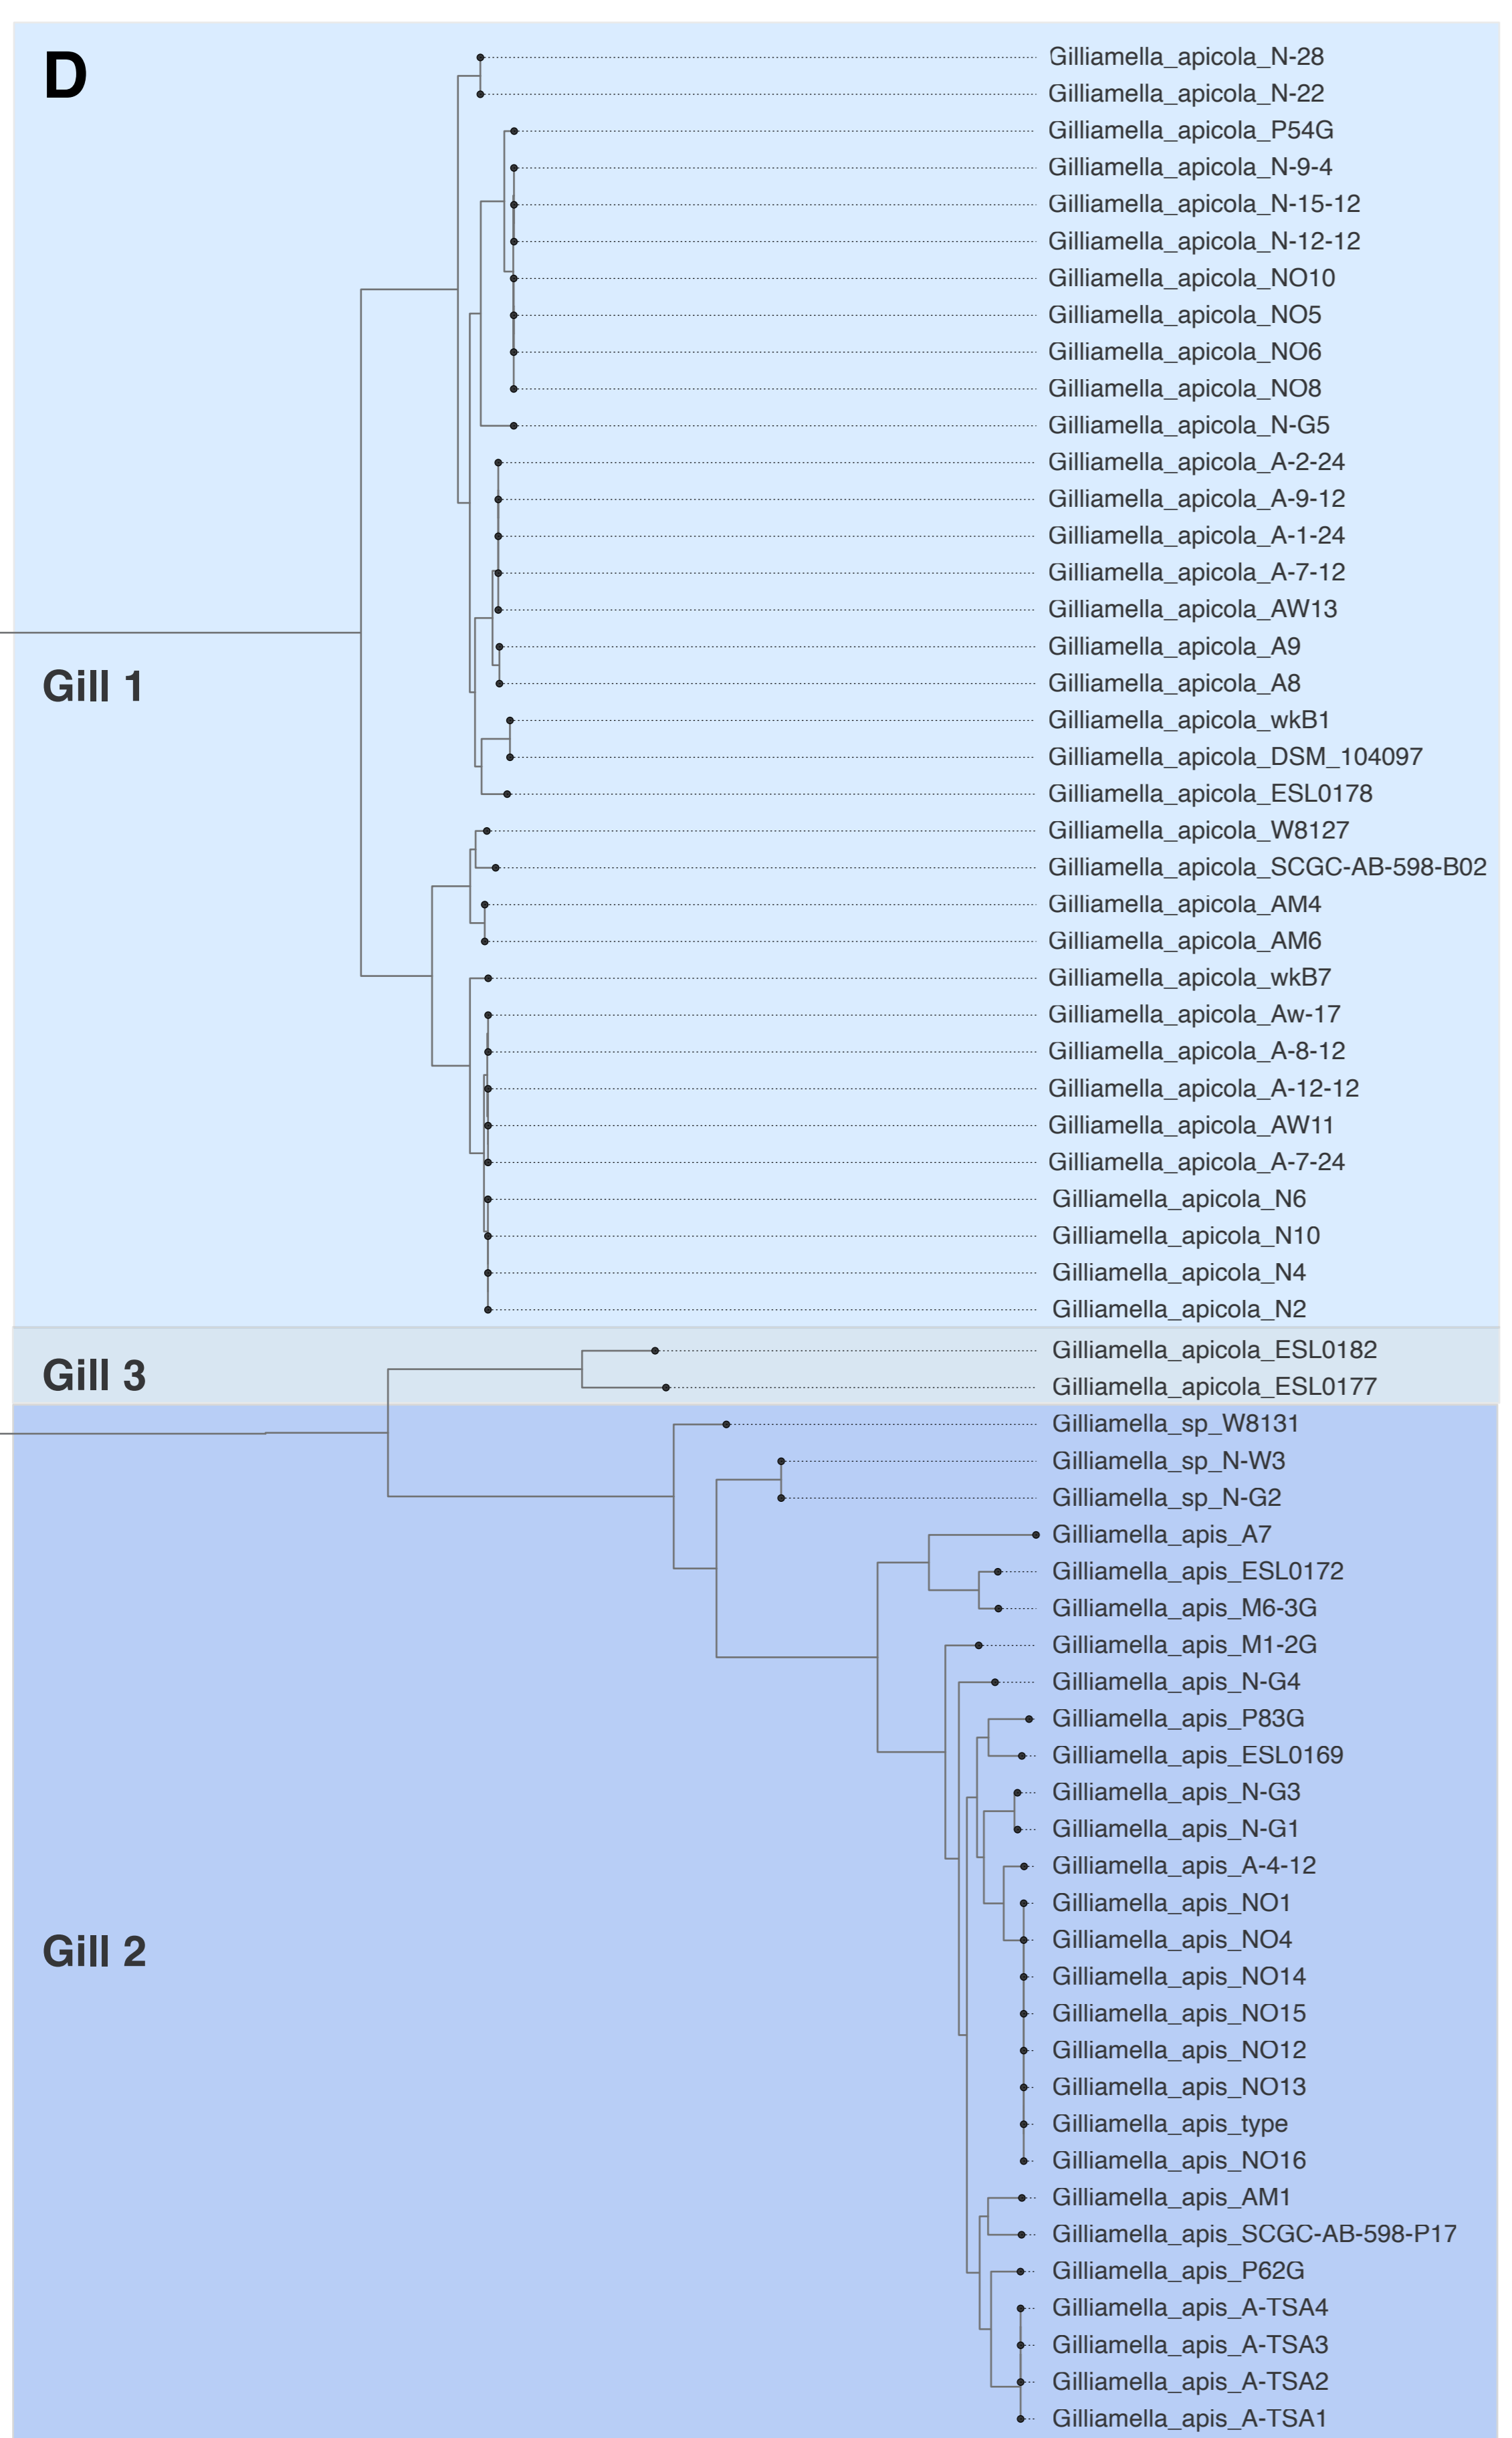

## rimM Amplicon Tree

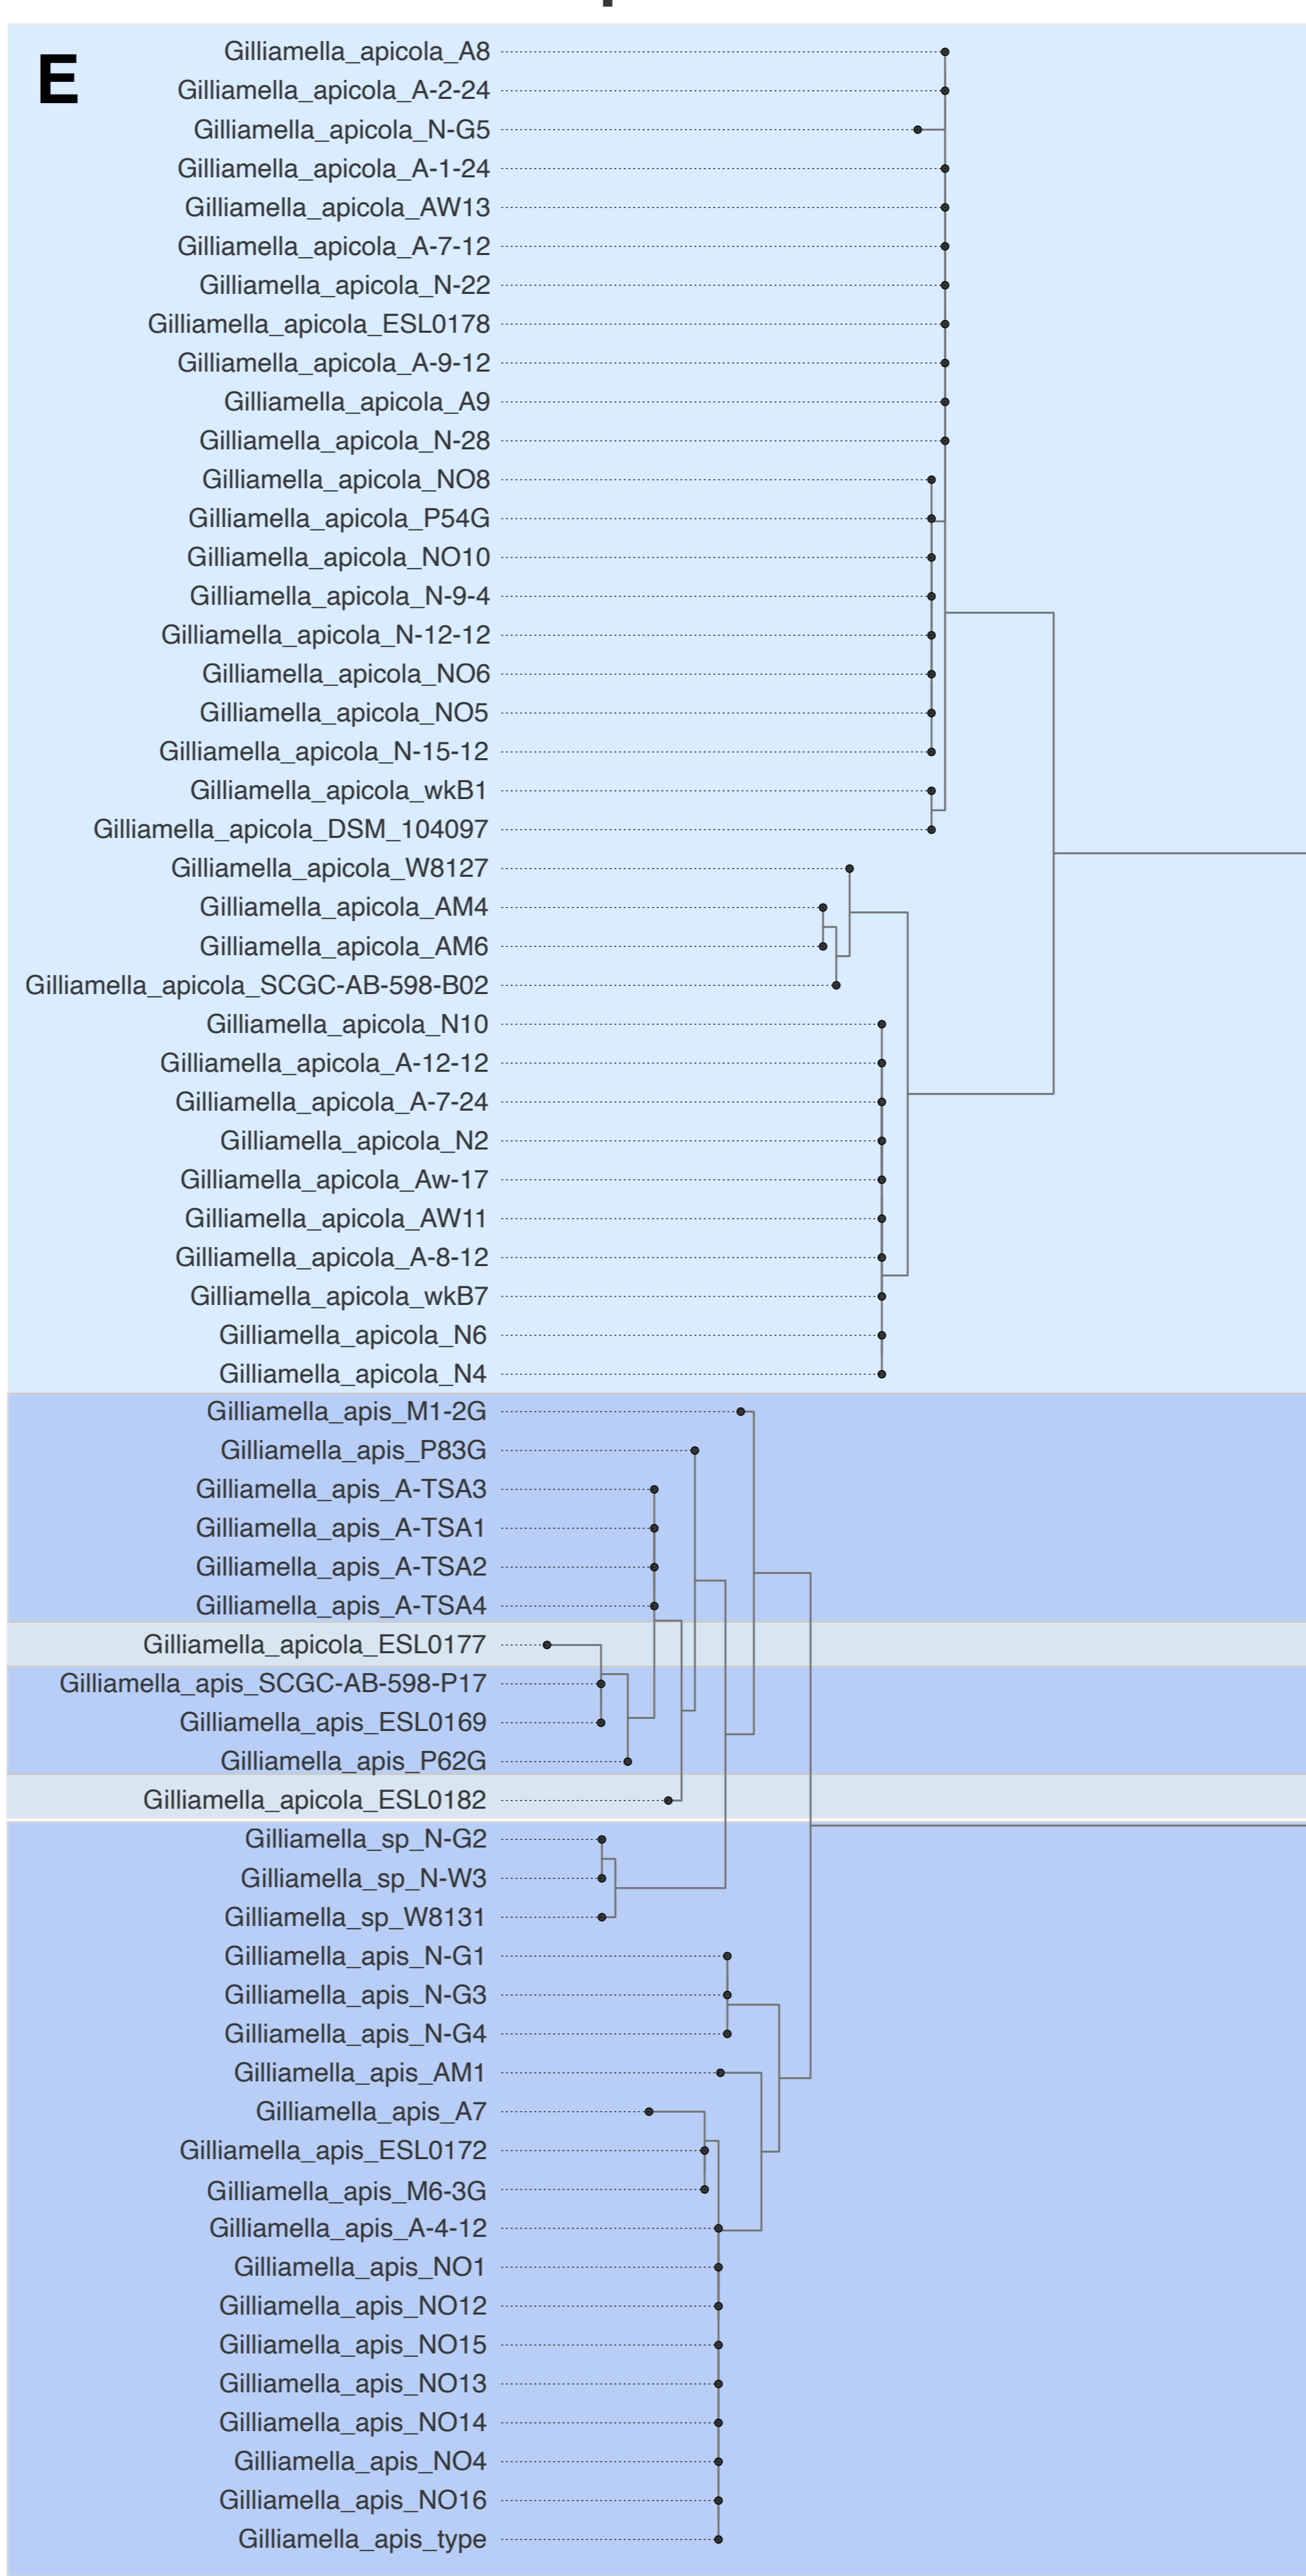

## pflA Amplicon Tree

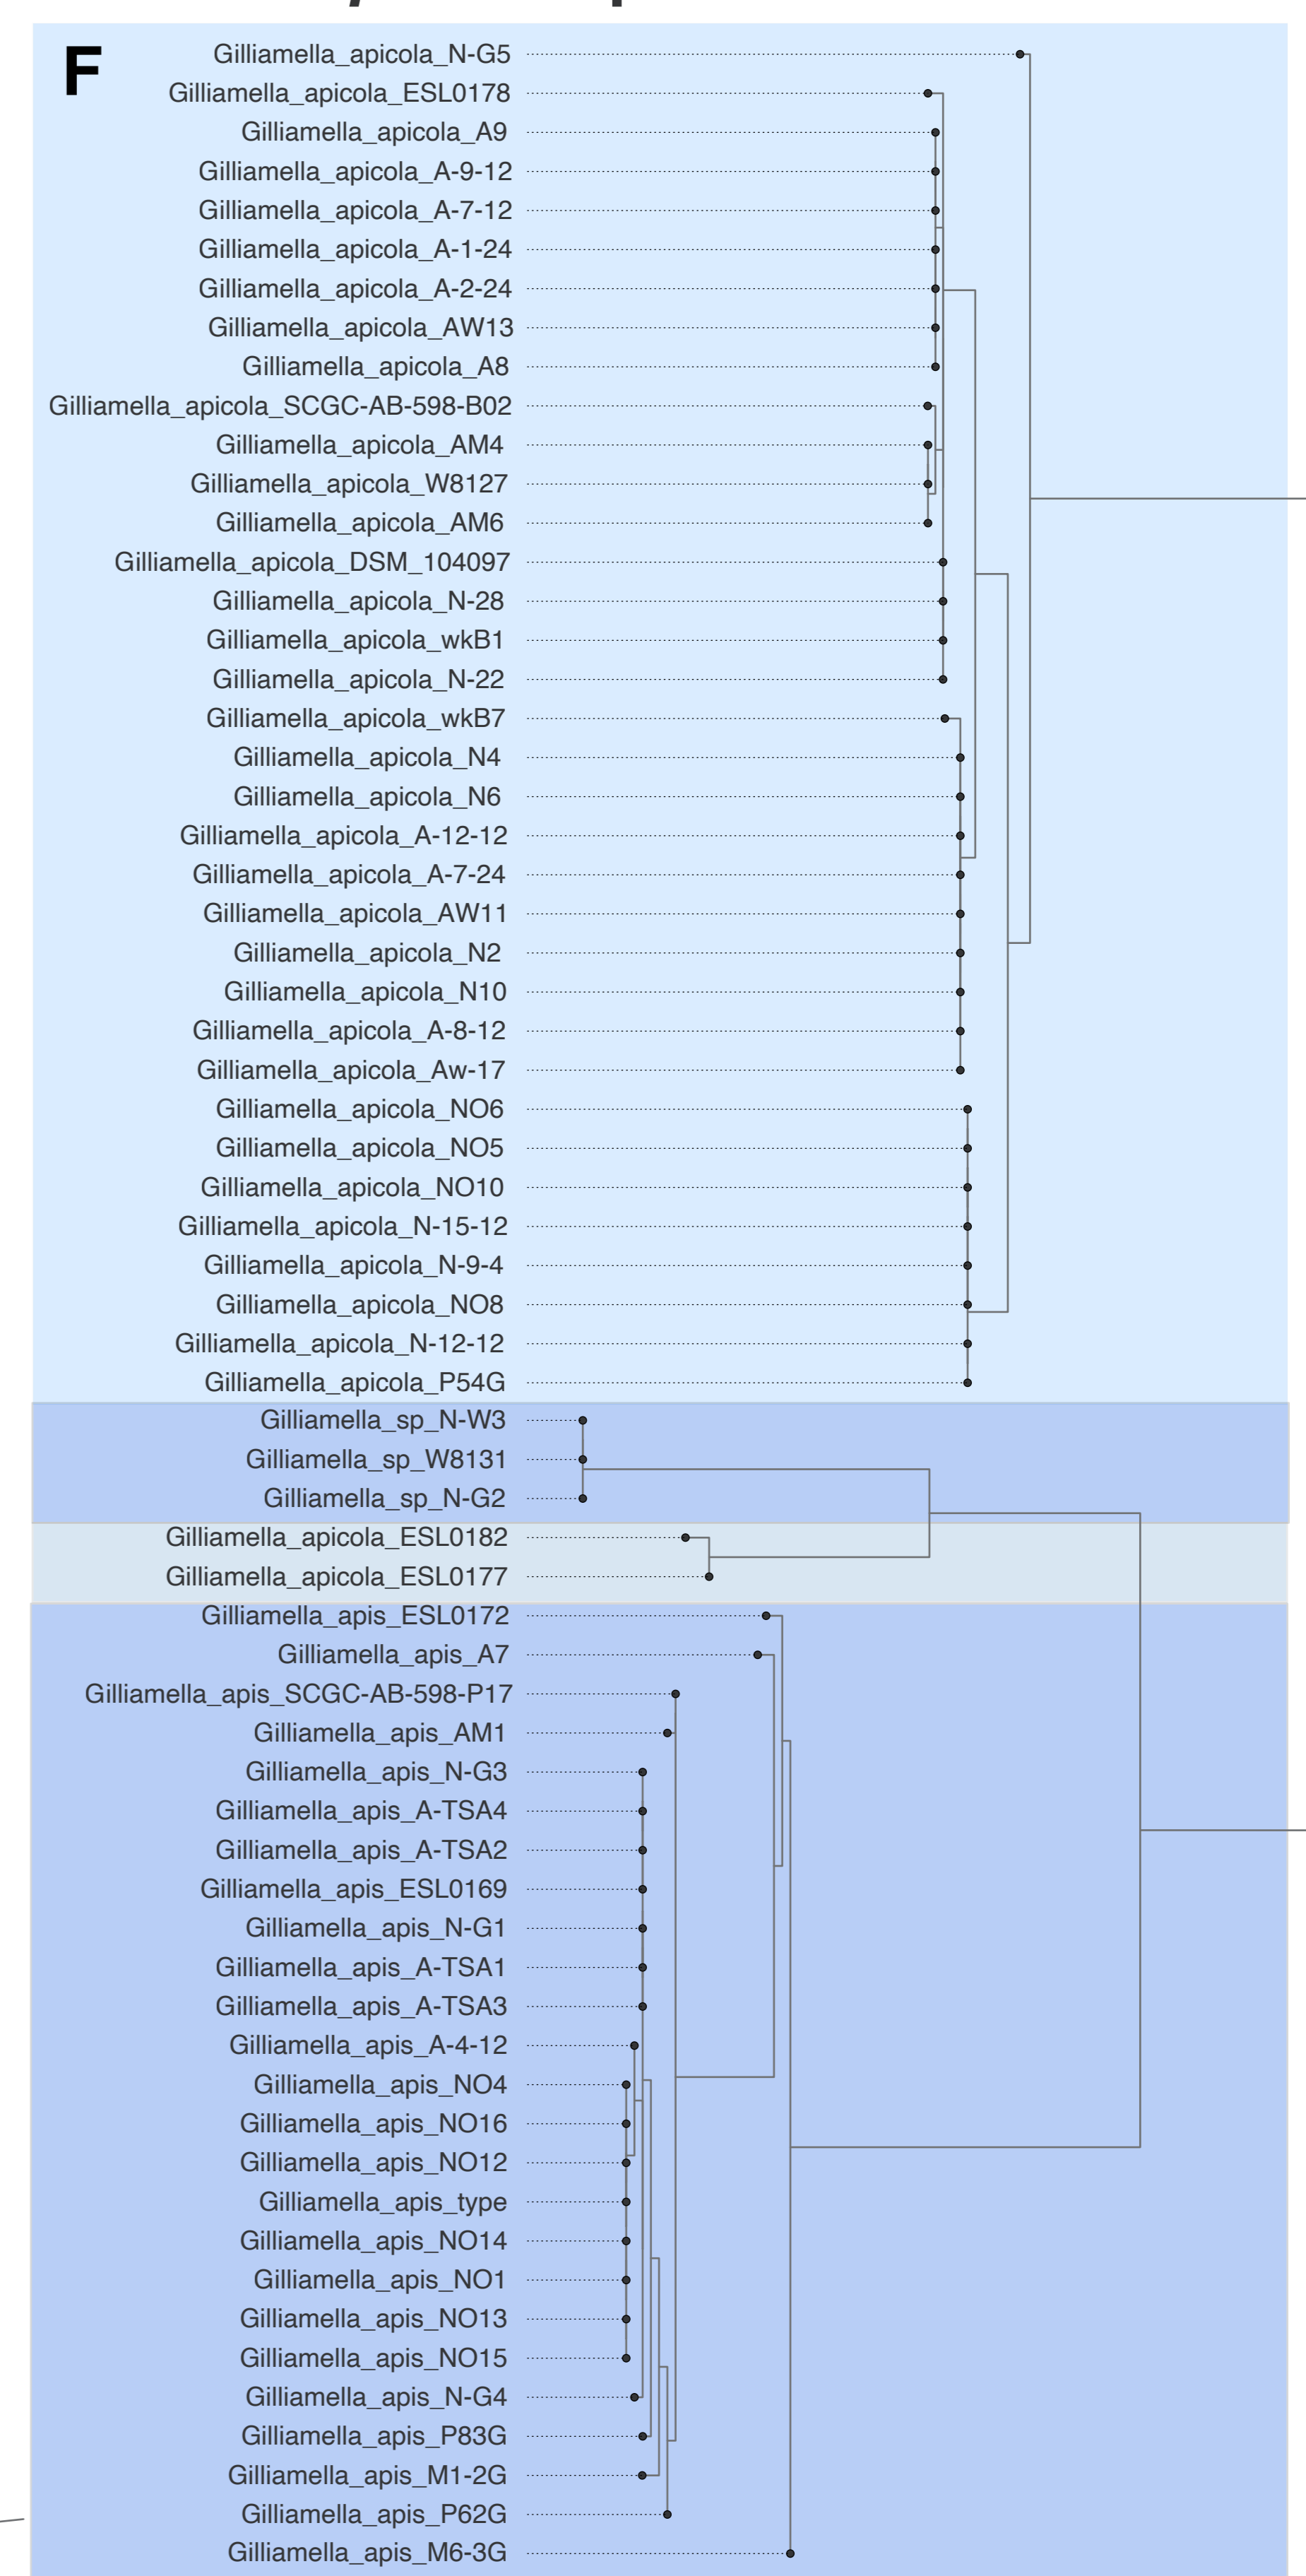

Supplement: mSphere.00694-20-sf002.pdf [file mSphere.00694-20-sf002.pdf]
